# Supplementary material
Source: PubMed Central journal article supplement (PMC516526)
Supplement: pnas_101_36_13257__1.pdf [file pnas_101_36_13257__1.pdf]

Table 3. List of all fusion cases

| No. | Clone Count | mRNA Accession                                         | EST Accession                                              | Known Status | Cell Type | Aberr* | Gene            | Gene 1            |                    |           | Gene 2        |                   |                    | Source    |                                                                                                    |
|-----|-------------|--------------------------------------------------------|------------------------------------------------------------|--------------|-----------|--------|-----------------|-------------------|--------------------|-----------|---------------|-------------------|--------------------|-----------|----------------------------------------------------------------------------------------------------|
|     |             |                                                        |                                                            |              |           |        |                 | List <sup>†</sup> | Chrom <sup>‡</sup> | UniGene   | Gene          | List <sup>†</sup> | Chrom <sup>‡</sup> |           | UniGene                                                                                            |
| 1   | 7           | AF361221                                               | BU943989, BU944045, BU944756, BU955765, BU957509, CA455392 | known        | cancer    | t      | <i>BCAS4</i>    | -                 | 20q13.13           | Hs.381178 | <i>BCAS3</i>  | -                 | 17q23.2            | Hs.287450 | Breast carcinoma, cell line MCF7; breast, adenocarcinoma, cell line, NIH_MGC_107                   |
| 2   | 6           | AF113911, AJ131466, AJ131467, AY043457, M13096, M25946 |                                                            | known        | cancer    | t      | <i>BCR</i>      | MF                | 22q11.23           | Hs.446394 | <i>ABL1</i>   | MF                | 9q34.12            | Hs.446504 | Acute lymphoblastic leukemia; chronic myeloid leukemia; chronic myeloid leukemia, cell line K562   |
| 3   | 5           | AJ301612, S62138, S75762, S75763, X71427               |                                                            | known        | cancer    | t      | <i>FUS</i>      | MF                | 16p11.2            | Hs.107720 | <i>MARS</i>   | -                 | 12q13.3            | Hs.355867 | Myxoid liposarcoma                                                                                 |
| 4   | 4           | AF272383, AF272384, AF272385, AY187923                 |                                                            | known        | cancer    | t      | <i>MLL</i>      | MF                | 11q23.3            | Hs.258855 | <i>MLLT10</i> | MF                | 10p12.31           | Hs.446451 | Acute lymphoblastic leukemia; acute myeloid leukemia                                               |
| 5   | 4           | AF031404, AF487905, AF492832, S67825                   |                                                            | known        | cancer    | t, r   | <i>MLL</i>      | MF                | 11q23.3            | Hs.258855 | <i>MLLT2</i>  | MF                | 4q21.3             | Hs.114765 | Acute lymphoblastic leukemia                                                                       |
| 6   | 3           | AF177238, AF177239, AF487906                           |                                                            | known        | cancer    | t, r   | <i>MLLT2</i>    | MF                | 4q21.3             | Hs.114765 | <i>MLL</i>    | MF                | 11q23.3            | Hs.258855 | Acute lymphoblastic leukemia; acute lymphoblastic leukemia, cell line MV4-11                       |
| 7   | 3           | AF364035, AJ303089, AJ303090                           |                                                            | known        | cancer    | t, r   | <i>RBM15</i>    | M                 | 1p13.3             | Hs.435947 | <i>MKLI</i>   | M                 | 22q13.1            | Hs.416266 | Acute megakaryocytic leukemia                                                                      |
| 8   | 2           | AF364036, AF364037                                     |                                                            | known        | cancer    | t, r   | <i>MKLI</i>     | M                 | 22q13.1            | Hs.416266 | <i>RBM15</i>  | M                 | 1p13.3             | Hs.435947 | Acute megakaryocytic leukemia                                                                      |
| 9   | 3           | AF125093, AF143407, AF390893                           |                                                            | known        | cancer    | t      | <i>TFG</i>      | F                 | 3q12.2             | Hs.446568 | <i>ALK</i>    | MF                | 2p23.2             | Hs.410680 | Anaplastic large cell lymphoma                                                                     |
| 10  | 3           | AF060929, AF060930, AF060931                           |                                                            | known        | cancer    | t      | <i>MLLT10</i>   | MF                | 10p12.31           | Hs.446451 | <i>PICALM</i> | F                 | 11q14.2            | Hs.39252  | Acute lymphoblastic leukemia                                                                       |
| 11  | 3           | AF512943, AF512945, AF512946                           |                                                            | known        | cancer    | t      | <i>MLL</i>      | MF                | 11q23.3            | Hs.258855 | <i>SEPT6</i>  | F                 | Xq24               | Hs.90998  | Acute myelomonocytic leukemia                                                                      |
| 12  | 3           | Y08643, Y15920, Y15921                                 |                                                            | known        | cancer    | t      | <i>COL1A1</i>   | F                 | 17q21.33           | Hs.172928 | <i>PDGFB</i>  | F                 | 22q13.1            | Hs.1976   | Dermatofibrosarcoma protuberans                                                                    |
| 13  | 2           | U08818, U19348                                         |                                                            | known        | cancer    | t      | <i>TPR</i>      | F                 | 1q31.1             | Hs.170472 | <i>MET</i>    | F                 | 7q31.2             | Hs.419124 | Transformed fibroblast, NIH3T3                                                                     |
| 14  | 2           | U02308, U02368                                         |                                                            | known        | cancer    | t      | <i>PAX3</i>     | MF                | 2q36.1             | Hs.42146  | <i>FOXO1A</i> | MF                | 13q14.11           | Hs.170133 | Alveolar rhabdomyosarcoma, cell line RH30                                                          |
| 15  | 2           | D45915, U04946                                         |                                                            | known        | cancer    | t      | <i>NPM1</i>     | MF                | 5q35.1             | Hs.411098 | <i>ALK</i>    | MF                | 2p23.2             | Hs.410680 | Anaplastic large cell lymphoma, cell line AMS3; anaplastic large cell lymphoma, cell line SU-DHL-1 |
| 16  | 2           | AJ549095, AJ549096                                     |                                                            | known        | cancer    | t      | <i>CREB3L2</i>  | M                 | 7q33               | Hs.59943  | <i>FUS</i>    | MF                | 16p11.2            | Hs.107720 | Fibromyxoid sarcoma                                                                                |
| 17  | 2           | AJ251843, AJ251844                                     |                                                            | known        | cancer    | t, r   | <i>MYST3</i>    | M                 | 8p11.21            | Hs.93231  | <i>CREBBP</i> | MF                | 16p13.3            | Hs.270804 | Acute myeloid leukemia                                                                             |
| 18  | 1           | AJ251845                                               |                                                            | known        | cancer    | t, r   | <i>CREBBP</i>   | MF                | 16p13.3            | Hs.270804 | <i>MYST3</i>  | M                 | 8p11.21            | Hs.93231  | Acute myeloid leukemia                                                                             |
| 19  | 2           | AF297748, AF297749                                     |                                                            | known        | cancer    | t      | <i>MLL</i>      | MF                | 11q23.3            | Hs.258855 | <i>GMPS</i>   | F                 | 3q25.31            | Hs.144057 | Acute myeloid leukemia                                                                             |
| 20  | 2           | AF186110, AF310722                                     |                                                            | known        | cancer    | t      | <i>TPM4</i>     | F                 | 19p13.12           | Hs.250641 | <i>ALK</i>    | MF                | 2p23.2             | Hs.410680 | Anaplastic large cell lymphoma; inflammatory myofibroblastic tumor                                 |
| 21  | 2           | AF312386, AF312387                                     |                                                            | known        | cancer    | t      | <i>RUNX1</i>    | MF                | 21q22.12           | Hs.410774 | -             | -                 | 19q13.42           | AY004251  | Acute myeloid leukemia                                                                             |
| 22  | 1           | X03541                                                 |                                                            | known        | cancer    | inv    | <i>TPM3</i>     | F                 | 1q21.3             | Hs.178468 | <i>NTRK1</i>  | F                 | 1q23.1             | Hs.406293 | Colon carcinoma                                                                                    |
| 23  | 1           | AY149631                                               |                                                            | known        | cancer    | t      | <i>FLJ21877</i> | -                 | 2p21               | NM_022065 | -             | -                 | 3p25.2             | AY149630  | Thyroid adenoma, cell line                                                                         |
| 24  | 1           | X85960                                                 |                                                            | known        | cancer    | t      | <i>TFG</i>      | F                 | 3q12.2             | Hs.446568 | <i>NTRK1</i>  | F                 | 1q23.1             | Hs.406293 | Thyroid carcinoma                                                                                  |
| 25  | 1           | U41743                                                 |                                                            | known        | cancer    | t      | <i>NPM1</i>     | MF                | 5q35.1             | Hs.411098 | <i>RARA</i>   | MF                | 17q21.2            | Hs.361071 | Acute promyelocytic leukemia                                                                       |
| 26  | 1           | AF492830                                               |                                                            | known        | cancer    | t      | <i>CDK6</i>     | M                 | 7q21.2             | Hs.38481  | <i>MLL</i>    | MF                | 11q23.3            | Hs.258855 | Acute lymphoblastic leukemia                                                                       |
| 27  | 1           | AF221550                                               |                                                            | known        | cancer    | t      | <i>COL1A2</i>   | -                 | 7q21.3             | Hs.232115 | <i>PLAG1</i>  | M                 | 8q12.1             | Hs.14968  | Lipoblastoma                                                                                       |
| 28  | 1           | AY222643                                               |                                                            | known        | cancer    | t      | <i>CREB3L2</i>  | M                 | 7q33               | Hs.59943  | <i>PPARG</i>  | MF                | 3p25.2             | Hs.387667 | Thyroid carcinoma                                                                                  |
| 29  | 1           | AJ297349                                               |                                                            | known        | cancer    | t      | <i>PCMI</i>     | F                 | 8p22               | Hs.348501 | <i>RET</i>    | MF                | 10q11.21           | Hs.350321 | Thyroid carcinoma                                                                                  |
| 30  | 1           | AJ298917                                               |                                                            | known        | cancer    | t, r   | <i>FGFR1</i>    | MF                | 8p12               | Hs.748    | <i>BCR</i>    | MF                | 22q11.23           | Hs.446394 | Hematologic malignancy                                                                             |
| 31  | 1           | AJ298916                                               |                                                            | known        | cancer    | t, r   | <i>BCR</i>      | MF                | 22q11.23           | Hs.446394 | <i>FGFR1</i>  | MF                | 8p12               | Hs.748    | Hematologic malignancy                                                                             |
| 32  | 1           | M31213                                                 |                                                            | known        | cancer    | inv    | <i>D10S170</i>  | MF                | 10q21.2            | Hs.446360 | <i>RET</i>    | MF                | 10q11.21           | Hs.350321 | Thyroid carcinoma                                                                                  |
| 33  | 1           | AJ299261                                               |                                                            | known        | cancer    | t, r   | <i>MYST4</i>    | F                 | 10q22.2            | Hs.27590  | <i>CREBBP</i> | MF                | 16p13.3            | Hs.270804 | Acute myeloid leukemia                                                                             |
| 34  | 1           | AJ299262                                               |                                                            | known        | cancer    | t, r   | <i>CREBBP</i>   | MF                | 16p13.3            | Hs.270804 | <i>MYST4</i>  | F                 | 10q22.2            | Hs.27590  | Acute myeloid leukemia                                                                             |
| 35  | 1           | AB000267                                               |                                                            | known        | cancer    | inv    | <i>NUP98</i>    | MF                | 11p15.4            | Hs.112255 | <i>DDX10</i>  | MF                | 11q22.3            | Hs.41706  | Myeloid malignancy                                                                                 |
| 36  | 1           | AB038155                                               |                                                            | known        | cancer    | t      | <i>NUP98</i>    | MF                | 11p15.4            | Hs.112255 | <i>HOXD13</i> | MF                | 2q31.1             | Hs.152414 | Acute myeloid leukemia                                                                             |
| 37  | 1           | AF422798                                               |                                                            | known        | cancer    | t      | <i>MLL</i>      | MF                | 11q23.3            | Hs.258855 | <i>LAF4</i>   | F                 | 2q11.2             | Hs.38070  | Acute lymphoblastic leukemia                                                                       |
| 38  | 1           | AF272374                                               |                                                            | known        | cancer    | t      | <i>MLL</i>      | MF                | 11q23.3            | Hs.258855 | <i>ELL</i>    | MF                | 19p13.11           | Hs.5881   | Acute myeloid leukemia                                                                             |
| 39  | 1           | AF231995                                               |                                                            | known        | cancer    | t      | <i>MLL</i>      | MF                | 11q23.3            | Hs.258855 | <i>GAS7</i>   | F                 | 17p13.1            | Hs.226133 | Acute myeloid leukemia                                                                             |
| 40  | 1           | AF477006                                               |                                                            | known        | cancer    | inv    | <i>MLL</i>      | MF                | 11q23.3            | Hs.258855 | <i>PICALM</i> | F                 | 11q14.2            | Hs.39252  | Acute myeloid leukemia                                                                             |
| 41  | 1           | AY187922                                               |                                                            | known        | cancer    | t      | <i>MLL</i>      | MF                | 11q23.3            | Hs.258855 | <i>EPS15</i>  | MF                | 1p32.3             | Hs.79095  | Acute lymphoblastic leukemia                                                                       |
| 42  | 1           | AY187921                                               |                                                            | known        | cancer    | t      | <i>MLL</i>      | MF                | 11q23.3            | Hs.258855 | <i>MLLT1</i>  | MF                | 19p13.3            | Hs.234774 | Acute lymphoblastic leukemia                                                                       |
| 43  | 1           | AF041811                                               |                                                            | known        | cancer    | t      | <i>ETV6</i>     | MF                | 12p13.2            | Hs.171262 | <i>NTRK3</i>  | F                 | 15q25.3            | Hs.26776  | Fibrosarcoma                                                                                       |
| 44  | 1           | X13230                                                 |                                                            | known        | cancer    | t      | <i>TMOD3</i>    | -                 | 15q21.2            | Hs.22826  | <i>MCF2</i>   | -                 | Xq27.1             | Hs.387262 | Breast carcinoma, cell line MCF7                                                                   |
| 45  | 1           | AF289510                                               |                                                            | known        | cancer    | t      | <i>TCF12</i>    | F                 | 15q21.3            | Hs.438166 | <i>NR4A3</i>  | MF                | 9q22.33            | Hs.279522 | Extraskeletal myxoid chondrosarcoma                                                                |
| 46  | 1           | M73779                                                 |                                                            | known        | cancer    | t      | <i>PML</i>      | MF                | 15q24.1            | Hs.89633  | <i>RARA</i>   | MF                | 17q21.2            | Hs.361071 | Acute promyelocytic leukemia                                                                       |
| 47  | 1           | AJ295163                                               |                                                            | known        | cancer    | t      | <i>FUS</i>      | MF                | 16p11.2            | Hs.107720 | <i>ATF1</i>   | MF                | 12q13.12           | Hs.36908  | Angiomatoid fibrous histiocytoma                                                                   |
| 48  | 1           | AF162670                                               |                                                            | known        | cancer    | t      | <i>TAF15</i>    | MF                | 17q12              | Hs.402752 | <i>NR4A3</i>  | MF                | 9q22.33            | Hs.279522 | Extraskeletal myxoid chondrosarcoma                                                                |

|     |   |                                                 |       |                    |     |                  |    |          |           |                  |    |          |           |                                                                                              |
|-----|---|-------------------------------------------------|-------|--------------------|-----|------------------|----|----------|-----------|------------------|----|----------|-----------|----------------------------------------------------------------------------------------------|
| 49  | 1 | L03357                                          | known | cancer             | t   | <i>PRKARIA</i>   | F  | 17q24.2  | Hs.280342 | <i>RET</i>       | MF | 10q11.21 | Hs.350321 | Thyroid tumor, cell line NF1002                                                              |
| 50  | 1 | S79325                                          | known | cancer             | t   | <i>SS18</i>      | MF | 18q11.2  | Hs.404263 | <i>SSX1</i>      | MF | Xp11.23  | Hs.434142 | Synovial sarcoma                                                                             |
| 51  | 1 | M31522                                          | known | cancer             | t   | <i>TCF3</i>      | MF | 19p13.3  | Hs.371282 | <i>PBX1</i>      | MF | 1q23.3   | Hs.408222 | Acute lymphoblastic leukemia                                                                 |
| 52  | 1 | AY040324                                        | known | cancer             | t   | <i>MECT1</i>     | MF | 19p13.11 | Hs.6051   | <i>MAML2</i>     | MF | 11q21    | Hs.112472 | Mucocutaneous carcinoma                                                                      |
| 53  | 1 | Z35296                                          | known | cancer             | t   | <i>RUNX1</i>     | MF | 21q22.12 | Hs.410774 | <i>CBFA2T1</i>   | MF | 8q21.3   | Hs.90858  | Acute myeloid leukemia                                                                       |
| 54  | 1 | AF419247                                        | known | cancer             | inv | <i>RUNX1</i>     | MF | 21q22.12 | Hs.410774 | <i>USP25</i>     | -  | 21q21.1  | Hs.186961 | Myelodysplastic bone marrow                                                                  |
| 55  | 1 | S69002                                          | known | cancer             | t   | <i>RUNX1</i>     | MF | 21q22.12 | Hs.410774 | <i>MDS1</i>      | MF | 3q26.2   | Hs.440966 | Chronic myeloid leukemia, cell line SKH1                                                     |
| 56  | 1 | AF327066                                        | known | cancer             | t   | <i>EWSR1</i>     | MF | 22q12.2  | Hs.374477 | <i>FLI1</i>      | MF | 11q24.3  | Hs.257049 | Ewings sarcoma                                                                               |
| 57  | 1 | X92120                                          | known | cancer             | t   | <i>EWSR1</i>     | MF | 22q12.2  | Hs.374477 | <i>MARS</i>      | -  | 12q13.3  | Hs.355867 | Myxoid liposarcoma                                                                           |
| 58  | 1 | U35622                                          | known | cancer             | t   | <i>EWSR1</i>     | MF | 22q12.2  | Hs.374477 | <i>ETV4</i>      | F  | 17q21.31 | Hs.434059 | Ewings sarcoma                                                                               |
| 59  | 1 | AF533682                                        | known | disease            | inv | <i>IL1RAPL1</i>  | -  | Xp21.3   | Hs.241385 | <i>DMD</i>       | -  | Xp21.1   | Hs.169470 | Muscle, Duchenne muscular dystrophy                                                          |
| 60  | 1 | U66055                                          | known | disease            | inv | <i>IDS</i>       | -  | Xq28     | Hs.303154 | -                | -  | Xq28     | U66053    | Fibroblast, Hunter syndrome                                                                  |
| 61  | 4 | BG181640,<br>BG183185,<br>BG191557,<br>BG208574 | new   | cancer             | t   | <i>RNGTT</i>     | -  | 6q15     | Hs.27345  | -                | -  | 12q13.13 | Hs.444433 | Fibrosarcoma, cell line HT-1080, random activation                                           |
| 62  | 4 | BG491331,<br>BM555536,<br>BM809442,<br>BM914863 | new   | cancer             | t   | <i>PMM2</i>      | -  | 16p13.2  | Hs.313504 | <i>FDPS</i>      | -  | 1q22     | Hs.335918 | Skin, amelanotic melanoma, cell line, NIH_MGC_41                                             |
| 63  | 3 | A1949061,<br>BF059236,<br>BF223017              | new   | cancer             | t   | <i>HRB</i>       | -  | 2q36.3   | Hs.352962 | <i>PVRL3</i>     | -  | 3q13.13  | Hs.436602 | Pooled germ cell tumors, NCI_CGAP_GC6                                                        |
| 64  | 3 | BU538795,<br>BU857782,<br>BU859760              | new   | cancer             | t   | <i>IRA1</i>      | -  | 3q26.32  | Hs.438970 | <i>RGS17</i>     | -  | 6q25.2   | Hs.268562 | Breast, adenocarcinoma, cell line, NIH_MGC_107                                               |
| 65  | 3 | BC036186,<br>BC048967                           | new   | normal             | inv | <i>BS69</i>      | -  | 10p15.3  | Hs.145894 | <i>ANUBL1</i>    | -  | 10q11.21 | Hs.409813 | Brain, hypothalamus, NIH_MGC_96                                                              |
| 66  | 2 | AA315813,<br>AW951984                           | new   | cancer;<br>unknown | inv | <i>FLJ20297</i>  | -  | 2q21.1   | Hs.94491  | <i>MDH1</i>      | -  | 2p15     | Hs.75375  | MAGE resequences, MAGB; colon carcinoma, cell line KM12C                                     |
| 67  | 2 | AA057480,<br>AA100762                           | new   | cancer             | inv | <i>MLLT2</i>     | MF | 4q21.3   | Hs.114765 | <i>UBE2D3</i>    | -  | 4q24     | Hs.411826 | Colon carcinoma, cell line T84                                                               |
| 68  | 2 | CB137971,<br>CB139392                           | new   | cancer             | t   | <i>FLJ20364</i>  | -  | 5q35.1   | Hs.32471  | <i>CDKL2</i>     | -  | 4q21.1   | Hs.143241 | Liver, cholangiocarcinoma, cell line CK-K1; liver, hepatocellular carcinoma, cell line HLK-1 |
| 69  | 2 | BQ056742,<br>BQ057316                           | new   | cancer             | t   | <i>HSPC196</i>   | -  | 11q12.2  | Hs.406530 | <i>DTNB</i>      | -  | 2p23.3   | Hs.406073 | Lymphoma, cell line, NIH_MGC_99                                                              |
| 70  | 2 | BQ073577,<br>BQ948076,<br>BX283235              | new   | cancer             | t   | <i>HMG2</i>      | MF | 12q14.3  | Hs.6421   | <i>ELAC2</i>     | -  | 17p12    | Hs.12124  | Lung, epidermoid carcinoma, cell line, NIH_MGC_101                                           |
| 71  | 2 | AK023167,<br>AX794778                           | new   | cancer             | t   | -                | -  | 13q12.11 | Hs.380712 | -                | -  | 4q13.3   | BC032771  | Teratocarcinoma, cell line NT2                                                               |
| 72  | 2 | BE616343,<br>BE736691                           | new   | cancer             | t   | <i>LMO7</i>      | -  | 13q22.2  | Hs.5978   | <i>TGFBI</i>     | -  | 5q31.1   | Hs.421496 | Pancreas, adenocarcinoma, cell line, NIH_MGC_39                                              |
| 73  | 2 | BG190768,<br>BG209671                           | new   | cancer             | inv | <i>C14orf145</i> | -  | 14q31.1  | Hs.333278 | <i>DC50</i>      | -  | 14q24.3  | Hs.324521 | Fibrosarcoma, cell line HT-1080, random activation                                           |
| 74  | 2 | BF203521,<br>BF203707                           | new   | cancer             | t   | -                | -  | 18q12.2  | Hs.501047 | <i>GNB1</i>      | -  | 1p36.33  | Hs.304694 | Muscle, rhabdomyosarcoma, cell line, NIH_MGC_17                                              |
| 75  | 2 | BM847416,<br>BM849429                           | new   | cancer             | t   | <i>KIAA0685</i>  | -  | 22q13.33 | Hs.449098 | <i>RAI</i>       | -  | 19q13.32 | Hs.324051 | Myeloma, cell line KMS-5                                                                     |
| 76  | 2 | CB124392,<br>CB125773                           | new   | cancer             | t   | <i>MGC39900</i>  | -  | Xq22.2   | Hs.422848 | <i>INSIG1</i>    | -  | 7q36.2   | Hs.416385 | Liver, hepatocellular carcinoma, cell line HLK-1                                             |
| 77  | 2 | AA303951,<br>AW960543                           | new   | normal;<br>unknown | t   | <i>KIAA0090</i>  | -  | 1p36.13  | Hs.439200 | <i>KNTC1</i>     | -  | 12q24.31 | Hs.300559 | MAGE resequences, MAGF; aorta endothelial cell                                               |
| 78  | 2 | CB959665,<br>CB988184                           | new   | normal             | t   | <i>cig5</i>      | -  | 2p25.2   | Hs.17518  | <i>WAC</i>       | -  | 10p12.1  | Hs.370152 | Placenta, NIH_MGC_147                                                                        |
| 79  | 2 | BC012553                                        | new   | normal             | t   | <i>LOC51244</i>  | -  | 3p25.1   | Hs.236257 | <i>FLJ22104</i>  | -  | 11q14.2  | Hs.183887 | Brain, primitive neuroectoderm, cell line,                                                   |
| 80  | 2 | AA255952,<br>AW977393                           | new   | normal;<br>unknown | t   | <i>GGA2</i>      | -  | 16p12.2  | Hs.133340 | <i>RPF1</i>      | -  | 1p22.3   | Hs.287863 | MAGE resequences, MAGO; germinal center B cell, NCI_CGAP_GCB1                                |
| 81  | 1 | AW439303                                        | new   | cancer             | t   | <i>UBE2J2</i>    | -  | 1p36.33  | Hs.441183 | <i>CPM</i>       | -  | 12q15    | Hs.334873 | Uterus, serous papillary carcinoma, NCI_CGAP_Ut4                                             |
| 82  | 1 | BF348299                                        | new   | cancer             | inv | <i>CAMTA1</i>    | -  | 1p36.31  | Hs.253254 | <i>MIG-6</i>     | -  | 1p36.23  | Hs.11169  | Brain, anaplastic oligodendroglioma,                                                         |
| 83  | 1 | AK074990                                        | new   | cancer             | inv | <i>MI-ER1</i>    | -  | 1p31.2   | Hs.222746 | <i>FLJ23091</i>  | -  | 1p31.2   | Hs.297792 | Teratocarcinoma, cell line NT2                                                               |
| 84  | 1 | CA438826                                        | new   | cancer             | t   | <i>DDAH1</i>     | -  | 1p22.3   | Hs.380870 | <i>MGC4677</i>   | -  | 2p11.2   | Hs.446688 | Lung, metastatic chondrosarcoma, cell line VS-8, NCI_CGAP_DH0                                |
| 85  | 1 | BM827801                                        | new   | cancer             | t   | <i>GUK1</i>      | -  | 1q42.13  | Hs.376933 | <i>ARFGAP1</i>   | -  | 20q13.33 | Hs.25584  | Stomach, lymphoblast-like, cell line SNU-1                                                   |
| 86  | 1 | A1814482                                        | new   | cancer             | t   | <i>CCT4</i>      | -  | 2p15     | Hs.374334 | <i>APGSL</i>     | -  | 6q21     | Hs.11171  | Lung, squamous cell carcinoma, NCI_CGAP_Lu19                                                 |
| 87  | 1 | AW081998                                        | new   | cancer             | t   | <i>COL3A1</i>    | -  | 2q32.2   | Hs.443625 | <i>GRSF1</i>     | -  | 4q13.3   | Hs.309763 | Esophagus, squamous cell carcinoma,                                                          |
| 88  | 1 | CB157092                                        | new   | cancer             | t   | <i>FLJ12519</i>  | -  | 2q32.2   | Hs.399984 | <i>LOC285498</i> | -  | 4p16.3   | Hs.248290 | Liver, cholangiocarcinoma, cell line J-SHC                                                   |
| 89  | 1 | BM469052                                        | new   | cancer             | t   | <i>NS3TP1</i>    | -  | 2q32.2   | Hs.101364 | <i>SUPT6H</i>    | -  | 17q11.2  | Hs.250429 | Testis, embryonal carcinoma, cell line, NIH_MGC_92                                           |
| 90  | 1 | BE739272                                        | new   | cancer             | inv | <i>MGC61571</i>  | -  | 3p24.1   | Hs.437336 | <i>AZZ</i>       | -  | 3p24.1   | Hs.512689 | Kidney, hypernephroma, cell line, NIH_MGC_58                                                 |
| 91  | 1 | BU845330                                        | new   | cancer             | t   | <i>QARS</i>      | -  | 3p21.31  | Hs.79322  | <i>AP2A1</i>     | -  | 19q13.33 | Hs.296426 | Ovary, teratocarcinoma, cell line, NIH_MGC_109                                               |
| 92  | 1 | BE792646                                        | new   | cancer             | t   | <i>ATP2C1</i>    | -  | 3q22.1   | Hs.106778 | <i>LOC51760</i>  | -  | 16p12.3  | NM_016524 | Lung, small cell carcinoma, cell line MGC3,                                                  |
| 93  | 1 | BC007229                                        | new   | cancer             | t   | <i>ABCC5</i>     | -  | 3q27.1   | Hs.34744  | <i>TGFBI</i>     | -  | 5q31.1   | Hs.421496 | Kidney renal cell adenocarcinoma, NIH_MGC_14                                                 |
| 94  | 1 | BI089294                                        | new   | cancer             | t   | <i>KIAA0114</i>  | -  | 4q12     | Hs.17719  | <i>EPI64</i>     | -  | 22q12.2  | Hs.380621 | Placenta, choriocarcinoma, cell line MGC36, NIH_MGC_10                                       |
| 95  | 1 | A1809466                                        | new   | cancer             | t   | <i>CCNI</i>      | -  | 4q21.1   | Hs.369110 | <i>CYorf15A</i>  | -  | Yq11.22  | Hs.171857 | B-cell, chronic lymphocytic leukemia,                                                        |
| 96  | 1 | BE873019                                        | new   | cancer             | t   | <i>ENCI</i>      | -  | 5q13.3   | Hs.104925 | <i>LRBA</i>      | -  | 4q31.23  | Hs.209846 | Colon, adenocarcinoma, cell line, NIH_MGC_65                                                 |
| 97  | 1 | AK092258                                        | new   | cancer             | t   | -                | -  | 5q15     | Hs.446400 | <i>USP11</i>     | -  | Xp11.3   | Hs.171501 | Teratocarcinoma, cell line NT2                                                               |
| 98  | 1 | A1174360                                        | new   | cancer             | t   | <i>KIAA0372</i>  | -  | 5q15     | Hs.435330 | <i>FLJ25070</i>  | -  | 1p21.1   | Hs.512635 | Wilms' tumor                                                                                 |
| 99  | 1 | W33075                                          | new   | cancer             | t   | <i>CD109</i>     | -  | 6q13     | Hs.94030  | <i>NPHP1</i>     | -  | 2q13     | Hs.280388 | Parathyroid gland, tumor                                                                     |
| 100 | 1 | BM841194                                        | new   | cancer             | t   | <i>CENT41</i>    | -  | 7p22.3   | Hs.135183 | <i>NOLCI</i>     | -  | 10q24.32 | Hs.75337  | Myeloma, cell line KMS-5                                                                     |
| 101 | 1 | AL561488                                        | new   | cancer             | t   | <i>HRI</i>       | -  | 7p22.1   | Hs.434986 | <i>KIAA0194</i>  | -  | 5q33.1   | Hs.200776 | Burkitt's lymphoma, cell line Ramos                                                          |
| 102 | 1 | BQ214674                                        | new   | cancer             | t   | <i>TRA2A</i>     | -  | 7p15.3   | Hs.445652 | <i>MGC11266</i>  | -  | 2p23.3   | Hs.293943 | Skin, melanotic melanoma, cell line, NIH_MGC_72                                              |
| 103 | 1 | BG220754                                        | new   | cancer             | inv | <i>CACNA2D1</i>  | -  | 7q21.11  | Hs.147871 | <i>PHF14</i>     | -  | 7p21.3   | Hs.409117 | Fibrosarcoma, cell line HT-1080, random activation                                           |
| 104 | 1 | BQ893362                                        | new   | cancer             | t   | <i>MGC40405</i>  | -  | 7q21.2   | Hs.119172 | <i>CPM</i>       | -  | 12q15    | Hs.334873 | Salivary gland, epidermoid carcinoma, cell line, NIH_MGC_102                                 |
| 105 | 1 | CB119417                                        | new   | cancer             | t   | <i>LAMB1</i>     | -  | 7q31.1   | Hs.122645 | <i>KPNA3</i>     | -  | 13q14.2  | Hs.407765 | Liver, cholangiocarcinoma, cell line SCK                                                     |
| 106 | 1 | BC006380                                        | new   | cancer             | t   | <i>NRF1</i>      | -  | 7q32.2   | Hs.202007 | <i>EIF4A1</i>    | -  | 17p13.1  | Hs.129673 | Brain neuroblastoma, NIH_MGC_19                                                              |
| 107 | 1 | BE243987                                        | new   | cancer             | t   | -                | -  | 7q32.3   | Hs.490096 | <i>TLOCI</i>     | -  | 3q26.2   | Hs.158193 | Acute lymphoblastic leukemia                                                                 |
| 108 | 1 | AW511397                                        | new   | cancer             | t   | -                | -  | 8p12     | Hs.458713 | -                | -  | 3p14.3   | AK126276  | Pooled germ cell tumors, NCI_CGAP_GC6                                                        |
| 109 | 1 | BE676586                                        | new   | cancer             | t   | <i>E2F5</i>      | -  | 8q21.2   | Hs.447905 | <i>BCL11A</i>    | MF | 2p16.1   | Hs.314623 | B-cell, chronic lymphocytic leukemia,                                                        |
| 110 | 1 | BM745903                                        | new   | cancer             | t   | -                | -  | 8q24.21  | Hs.512446 | <i>SLC11A2</i>   | -  | 11p13    | NM_004171 | Stomach, lymphoblast-like, cell line SNU-16                                                  |
| 111 | 1 | BG192319                                        | new   | cancer             | t   | -                | -  | 9q21.12  | Hs.54957  | <i>NPM1</i>      | MF | 5q35.1   | Hs.411098 | Fibrosarcoma, cell line HT-1080, random activation                                           |
| 112 | 1 | BX382859                                        | new   | cancer             | t   | <i>ZNF37A</i>    | -  | 10p11.1  | Hs.446382 | <i>TUBGCP6</i>   | -  | 22q13.33 | Hs.336431 | T-lymphoma, cell line Jurkat                                                                 |

|     |   |          |          |        |        |               |          |          |           |           |          |          |           |                                                                 |                             |
|-----|---|----------|----------|--------|--------|---------------|----------|----------|-----------|-----------|----------|----------|-----------|-----------------------------------------------------------------|-----------------------------|
| 113 | 1 | BM152333 | new      | cancer | t      | RAG2          | -        | 11p12    | Hs.159376 | BACH2     | -        | 6q15     | Hs.88414  | Acute lymphoblastic leukemia                                    |                             |
| 114 | 1 | BG687612 | new      | cancer | t      | UBE2L6        | -        | 11q12.1  | Hs.425777 | LOC203522 | -        | Xq26.3   | Hs.15282  | Lung, mucopidermoid carcinoma, cell line,                       |                             |
| 115 | 1 | BF528396 | new      | cancer | t      | VAMP1         | -        | 12p13.31 | Hs.200271 | WBSCR20C  | -        | 7q11.23  | Hs.436034 | Brain, anaplastic oligodendroglioma,                            |                             |
| 116 | 1 | BE281028 | new      | cancer | t      | REA           | -        | 12p13.31 | Hs.444499 | SPINT1    | -        | 15q15.1  | Hs.233950 | Placenta, choriocarcinoma, cell line, NIH_MGC_21                |                             |
| 117 | 1 | BG386606 | new      | cancer | inv    | EK11          | -        | 12p12.1  | Hs.120049 | KIAA0528  | -        | 12p12.1  | Hs.30656  | Colon, adenocarcinoma, cell line, NIH_MGC_15                    |                             |
| 118 | 1 | BU181747 | new      | cancer | t      | LASS5         | -        | 12q13.12 | Hs.458450 | NPL       | -        | 1q25.3   | Hs.64896  | Eye, retinoblastoma, cell line, NIH_MGC_67                      |                             |
| 119 | 1 | BQ434418 | new      | cancer | inv    | TIP120A       | -        | 12q14.3  | Hs.512638 | GNS       | -        | 12q14.3  | Hs.334534 | Skin, melanotic melanoma, cell line, NIH_MGC_72                 |                             |
| 120 | 1 | BG166334 | new      | cancer | t      | KIAA0701      | -        | 12q23.1  | Hs.153293 | PXK       | -        | 3p14.3   | Hs.77646  | Kidney, hypernephroma, cell line, NIH_MGC_89                    |                             |
| 121 | 1 | B1335248 | new      | cancer | inv    | KIAA0970      | -        | 13q14.2  | Hs.103329 | ESD       | -        | 13q14.2  | Hs.432491 | Cervix, carcinoma, cell line, NIH_MGC_12                        |                             |
| 122 | 1 | BF203978 | new      | cancer | t      | ANKRD10       | -        | 13q34    | Hs.164969 | PKMYT1    | -        | 16p13.3  | Hs.77783  | Muscle, rhabdomyosarcoma, cell line, NIH_MGC_17                 |                             |
| 123 | 1 | BG389369 | new      | cancer | t      | FLJ20313      | -        | 15q13.3  | Hs.126721 | DC-TM4F2  | -        | 10q22.3  | Hs.509050 | Testis, embryonal carcinoma, cell line, NIH_MGC_92              |                             |
| 124 | 1 | AL135593 | new      | cancer | t      | ETFA          | -        | 15q24.2  | Hs.169919 | SCO1      | -        | 17p13.1  | Hs.14511  | Skin, melanoma, cell line MeWo                                  |                             |
| 125 | 1 | AK127563 | new      | cancer | t      | IREB2         | -        | 15q25.1  | Hs.370324 | OXR1      | -        | 8q23.1   | Hs.432398 | Tongue tumor                                                    |                             |
| 126 | 1 | CB122525 | new      | cancer | t      | AWP1          | -        | 15q25.1  | Hs.83954  | PSMB1     | -        | 6q27     | Hs.352768 | Liver, cholangiocarcinoma, cell line Cho-CK                     |                             |
| 127 | 1 | AL555315 | new      | cancer | t      | -             | -        | 15q25.2  | Hs.498330 | RBM5      | -        | 3p21.31  | Hs.439480 | Cervical cancer, cell line HeLa                                 |                             |
| 128 | 1 | BG469825 | new      | cancer | inv    | JQGAP1        | -        | 15q26.1  | Hs.1742   | IDH2      | -        | 15q26.2  | Hs.5337   | Colon, adenocarcinoma, cell line, NIH_MGC_15                    |                             |
| 129 | 1 | BG529061 | new      | cancer | t      | FLJ31153      | -        | 16p13.11 | Hs.350424 | SLC12A2   | -        | 5q23.2   | Hs.110736 | Prostate, adenocarcinoma, cell line, NIH_MGC_60                 |                             |
| 130 | 1 | BF124990 | new      | cancer | t      | LAT1-3TM      | -        | 16p11.2  | NM_031211 | -         | -        | 17q23.2  | Hs.410998 | Skin, melanotic melanoma, cell line, NIH_MGC_20                 |                             |
| 131 | 1 | CA429191 | new      | cancer | t      | RBL2          | -        | 16q12.2  | Hs.283604 | C3orf1    | -        | 3q13.33  | Hs.210036 | Cartilage, chondrosarcoma, cell line CS8, NCI CGAP FHI          |                             |
| 132 | 1 | BM755010 | new      | cancer | t      | NQO1          | -        | 16q22.1  | Hs.406515 | KIAA0372  | -        | 5q15     | Hs.435330 | Stomach, lymphoblast-like, cell line SNU-1                      |                             |
| 133 | 1 | BX370328 | new      | cancer | t      | FLJ10520      | -        | 16q22.3  | Hs.77510  | HSH2      | -        | 19p13.12 | Hs.512797 | T-lymphoma, cell line Jurkat                                    |                             |
| 134 | 1 | BU192483 | new      | cancer | inv    | FLJ20343      | -        | 17p12    | Hs.171044 | NCOR1     | -        | 17p12    | Hs.144904 | Testis, embryonal carcinoma, cell line, NIH_MGC_92              |                             |
| 135 | 1 | BQ213899 | new      | cancer | t      | RAB31         | -        | 18p11.22 | Hs.223025 | EEF1A1    | -        | 6q13     | Hs.439552 | Lung, large cell carcinoma, cell line, NIH_MGC_68               |                             |
| 136 | 1 | BE618276 | new      | cancer | t      | MGC10200      | -        | 18q21.1  | Hs.134726 | NAG       | -        | 2p24.3   | Hs.413771 | Eye, retinoblastoma, cell line, NIH_MGC_67                      |                             |
| 137 | 1 | AI763093 | new      | cancer | t      | FLJ22378      | -        | 18q23    | Hs.288284 | -         | -        | 20q13.13 | Hs.356766 | B-cell, chronic lymphocytic leukemia,                           |                             |
| 138 | 1 | BU844738 | new      | cancer | t      | E1F3S4        | -        | 19p13.2  | Hs.28081  | LOC283989 | -        | 17q25.1  | Hs.378501 | Ovary, teratocarcinoma, cell line, NIH_MGC_109                  |                             |
| 139 | 1 | BM561692 | new      | cancer | t      | GLTSCR2       | -        | 19q13.33 | Hs.421907 | KIAA0792  | -        | 1q42.12  | Hs.119387 | Small intestine, duodenal adenocarcinoma, cell line, NIH_MGC_88 |                             |
| 140 | 1 | BF244226 | new      | cancer | inv    | -             | -        | 22q11.23 | Hs.505467 | DDT       | -        | 22q11.23 | Hs.433902 | Brain, glioblastoma, cell line, NIH_MGC_57                      |                             |
| 141 | 1 | CB112861 | new      | cancer | inv    | -             | -        | 22q12.2  | Hs.318954 | YWHAH     | -        | 22q12.3  | Hs.226755 | Liver, cholangiocarcinoma, cell line Cho-CK                     |                             |
| 142 | 1 | BU849679 | new      | cancer | inv    | TOB2          | -        | 22q13.2  | Hs.4994   | ACO2      | -        | 22q13.2  | Hs.300463 | Ovary, teratocarcinoma, cell line, NIH_MGC_109                  |                             |
| 143 | 1 | BX350623 | new      | cancer | t      | DIAPH2        | -        | Xq21.33  | Hs.226483 | C2orf132  | -        | 20q11.23 | Hs.349125 | Burkitt's lymphoma, cell line Ramos                             |                             |
| 144 | 1 | BE540893 | new      | cancer | inv    | FLNA          | -        | Xq28     | Hs.195464 | ATP6A1    | -        | Xq28     | Hs.6551   | Placenta, choriocarcinoma, cell line MGC36, NIH_MGC_10          |                             |
| 145 | 1 | AW014907 | new      | mixed  | inv    | MSF           | MF       | 17q25.3  | Hs.288094 | -         | -        | 17q23.2  | Hs.410998 | Pooled, NCI CGAP Sub1                                           |                             |
| 146 | 1 | BX441343 | new      | normal | t      | PRDM16        | M        | 1p36.32  | Hs.409905 | PCDHGC3   | -        | 5q31.3   | Hs.283794 | Brain                                                           |                             |
| 147 | 1 | CD109875 | new      | normal | t      | ZNF262        | -        | 1p34.3   | Hs.150390 | LPP       | MF       | 3q28     | Hs.180398 | Placenta, NIH_MGC_147                                           |                             |
| 148 | 1 | AI420901 | new      | normal | t      | BBP           | -        | 1p31.3   | Hs.276876 | TLE2      | -        | 19p13.3  | Hs.332173 | Prostate, NCI CGAP Pr28                                         |                             |
| 149 | 1 | BX098276 | new      | normal | t      | DKFZp5471048  | -        | 1p31.1   | Hs.200286 | -         | -        | 10q26.11 | Hs.69494  | Testis                                                          |                             |
| 150 | 1 | BI834312 | new      | normal | t      | TGFBR3        | -        | 1p22.1   | Hs.342874 | FGD3      | -        | 9q22.31  | Hs.411081 | Pooled pancreas and spleen, NIH_MGC_120                         |                             |
| 151 | 1 | CD701001 | new      | normal | t      | STAF42        | -        | 1q24.1   | Hs.435967 | EBF       | -        | 5q33.3   | Hs.120785 | Nasopharynx                                                     |                             |
| 152 | 1 | AX427505 | new      | normal | t      | RGL           | -        | 1q25.3   | Hs.79219  | HMG2L1    | -        | 22q12.3  | Hs.92260  | Liver                                                           |                             |
| 153 | 1 | AI989352 | new      | normal | t      | TSNAX         | -        | 1q42.2   | Hs.96247  | RPL9      | -        | 4p14     | Hs.412370 | Thymus                                                          |                             |
| 154 | 1 | BM676373 | new      | normal | t      | LTBP1         | -        | 2p22.3   | Hs.241257 | -         | -        | 21q21.1  | Hs.102754 | Eye                                                             |                             |
| 155 | 1 | AV743265 | new      | normal | inv    | HTLF          | -        | 2p16.3   | Hs.103126 | CXCR4     | -        | 2q21.3   | Hs.421986 | CD34+ hematopoietic stem/progenitor cell                        |                             |
| 156 | 1 | BI462676 | new      | normal | inv    | SIAT9         | -        | 2p11.2   | Hs.415117 | KCMF1     | -        | 2p11.2   | Hs.5392   | Testis, NIH_MGC_97                                              |                             |
| 157 | 1 | CF593854 | new      | normal | t      | RAB3GAP       | -        | 2q21.3   | Hs.306327 | PCOLN3    | -        | 16q24.3  | Hs.183138 | Placenta, NIH_MGC_147                                           |                             |
| 158 | 1 | AL832395 | new      | normal | t      | ARHGAP15      | -        | 2q22.2   | Hs.433597 | MBNL1     | -        | 3q25.2   | Hs.28578  | Lymph node                                                      |                             |
| 159 | 1 | BI518724 | new      | normal | t      | GCA           | -        | 2q24.2   | Hs.377894 | FLJ20356  | -        | 4p16.1   | Hs.61053  | Leukocyte, NIH_MGC_118                                          |                             |
| 160 | 1 | AK093926 | new      | normal | inv    | SP3           | -        | 2q31.1   | Hs.154295 | FLJ20080  | -        | 2p14     | Hs.7942   | Trachea                                                         |                             |
| 161 | 1 | BG756114 | new      | normal | t      | KIAA0121      | -        | 3p25.3   | Hs.155584 | UBE2E3    | -        | 2q31.3   | Hs.449501 | Primary B-cells from tonsils, cell line, NIH_MGC_48             |                             |
| 162 | 1 | CB995744 | new      | normal | t      | RAFTLIN       | -        | 3p24.3   | Hs.436432 | MAPK9     | -        | 5q35.3   | Hs.348446 | Placenta, pre-eclamptic, NIH_MGC_148                            |                             |
| 163 | 1 | CA405937 | new      | normal | t      | ZNF288        | -        | 3q13.31  | Hs.436987 | GNAS      | F        | 20q13.32 | Hs.157307 | Adipose                                                         |                             |
| 164 | 1 | BQ181358 | new      | normal | inv    | GOLGB1        | -        | 3q21.1   | Hs.445083 | FLJ13386  | -        | 3q22.2   | Hs.443301 | Knee, osteoarthritic cartilage, NCI CGAP Carl                   |                             |
| 165 | 1 | AV760860 | new      | normal | t      | PDCD10        | -        | 3q26.1   | Hs.424619 | ARHGAP15  | -        | 2q22.3   | Hs.433597 | CD34+ hematopoietic stem/progenitor cell                        |                             |
| 166 | 1 | BM920574 | new      | normal | t      | LDB2          | -        | 4p15.32  | Hs.4980   | TAX1BP1   | -        | 7p15.2   | Hs.5437   | Pooled lung and spleen, NIH_MGC_122                             |                             |
| 167 | 1 | BI758136 | new      | normal | t      | BTC           | -        | 4q13.3   | Hs.73105  | SPIN      | -        | 9q22.1   | Hs.439052 | Brain, NIH_MGC_114                                              |                             |
| 168 | 1 | BI823499 | new      | normal | t      | KIAA0905      | -        | 4q21.22  | Hs.436549 | PTEN      | F        | 10q23.31 | Hs.253309 | Pooled brain, lung, and testis, NIH_MGC_115                     |                             |
| 169 | 1 | AK127824 | new      | normal | t      | JADE1         | -        | 4q28.2   | Hs.12420  | -         | -        | 18p11.22 | Hs.29739  | Placenta                                                        |                             |
| 170 | 1 | BI596864 | new      | normal | t      | NEK1          | -        | 4q33     | Hs.414410 | RPS6KC1   | -        | 1q32.3   | Hs.30352  | Brain, hypothalamus, NIH_MGC_96                                 |                             |
| 171 | 1 | BX396716 | new      | normal | t      | AP3S1         | -        | 5q22.3   | Hs.406191 | GAI7      | -        | 11p13    | Hs.44893  | Placenta                                                        |                             |
| 172 | 1 | BX463119 | new      | normal | t      | NS3TP2        | -        | 5q23.2   | Hs.281147 | ITIH3     | -        | 3p21.1   | Hs.76716  | Liver                                                           |                             |
| 173 | 1 | BM503944 | new      | normal | t      | HMGN3         | -        | 6q14.1   | Hs.77558  | TMEM5     | -        | 12q14.2  | Hs.112986 | Pancreas, islet                                                 |                             |
| 174 | 1 | BI833146 | new      | normal | inv    | RARSL         | -        | 6q15     | Hs.432918 | HECA      | -        | 6q24.1   | Hs.6679   | Pooled pancreas and spleen, NIH_MGC_120                         |                             |
| 175 | 1 | CA841180 | new      | normal | inv    | C6orf111      | -        | 6q16.2   | Hs.414993 | QRS1      | -        | 6q21     | Hs.406917 | Pancreas, islet                                                 |                             |
| 176 | 1 | BU655987 | new      | normal | inv    | CD164         | -        | 6q21     | Hs.43910  | PNRC1     | -        | 6q15     | Hs.75969  | Blood, erythroid precursor cell                                 |                             |
| 177 | 1 | BI600664 | new      | normal | inv    | WBSCR20A      | -        | 7q11.23  | Hs.272820 | PPLA      | -        | 7p13     | Hs.356331 | Brain, hypothalamus, NIH_MGC_96                                 |                             |
| 178 | 1 | AW119175 | new      | normal | t      | HIP1          | F        | 7q11.23  | Hs.444795 | ANGPT1    | -        | 8q23.1   | Hs.2463   | Pooled                                                          |                             |
| 179 | 1 | AK127163 | new      | normal | inv    | VIK           | -        | 7q22.1   | Hs.414454 | KIAA1068  | -        | 7p13     | Hs.4770   | Brain, caudate nucleus                                          |                             |
| 180 | 1 | AI126219 | new      | normal | t      | ZNF36         | -        | 7q22.1   | Hs.24758  | RPLP0     | -        | 12q24.23 | Hs.443796 | Testis                                                          |                             |
| 181 | 1 | CB988238 | new      | normal | inv    | PPP2R2A       | -        | 8p21.2   | Hs.512628 | LOC115294 | -        | 8q11.23  | Hs.380763 | Placenta, NIH_MGC_147                                           |                             |
| 182 | 1 | AI206708 | new      | normal | inv    | HTPAP         | -        | 8p12     | Hs.437179 | ADAM18    | -        | 8p11.22  | Hs.127930 | Testis                                                          |                             |
| 183 | 1 | AK128617 | new      | normal | t      | PKHD1L1       | -        | 8q23.1   | Hs.170128 | MACF1     | -        | 1p34.3   | Hs.372463 | Trachea                                                         |                             |
| 184 | 1 | CF138660 | new      | normal | t      | TRPS1         | -        | 8q23.3   | Hs.26102  | KIAA1280  | -        | Xp22.22  | Hs.12913  | Lymph, germinal center B cells, cell line MGC85, NIH_MGC_50     |                             |
| 185 | 1 | BC034435 | BI831452 | new    | normal | inv           | FLJ14129 | -        | 8q24.3    | Hs.512740 | KIAA0150 | -        | 8q24.3    | Hs.370491                                                       | Brain, medulla, NIH_MGC_119 |
| 186 | 1 | BX359670 | new      | normal | t      | RECK          | -        | 9p13.3   | Hs.388918 | CDK5RAP3  | -        | 17q21.32 | Hs.20157  | Placenta                                                        |                             |
| 187 | 1 | BC036779 | BM925273 | new    | normal | t             | PIPSK2A  | -        | 10p12.2   | Hs.108966 | RPS6KC1  | -        | 1q32.3    | Hs.30352                                                        | Brain, NIH_MGC_114          |
| 188 | 1 | BI767196 | new      | normal | t      | -             | -        | 10q23.31 | Hs.406224 | HRBL      | -        | 7q22.1   | Hs.278502 | Pooled lung and spleen, NIH_MGC_122                             |                             |
| 189 | 1 | BI669204 | new      | normal | inv    | RAB6IP1       | -        | 11p15.4  | Hs.26797  | PPF1BP2   | -        | 11p15.4  | Hs.12953  | Brain, hypothalamus, NIH_MGC_96                                 |                             |
| 190 | 1 | BX440752 | new      | normal | t      | LOC58486      | -        | 11p15.4  | Hs.25726  | DC-Ubp    | -        | 5q35.1   | Hs.179852 | Brain                                                           |                             |
| 191 | 1 | BI831720 | new      | normal | t      | MICAL2        | -        | 11p15.3  | Hs.309674 | LPO       | -        | 17q23.2  | Hs.234742 | Brain, medulla, NIH_MGC_119                                     |                             |
| 192 | 1 | BE221750 | new      | normal | t      | -             | -        | 11q13.3  | Hs.523858 | LOC285924 | -        | 7p22.1   | Hs.372707 | Kidney, NCI CGAP Kid11                                          |                             |
| 193 | 1 | AK075222 | new      | normal | t      | C11orf30      | -        | 11q13.5  | Hs.352588 | SLC30A9   | -        | 4p13     | Hs.364615 | Placenta                                                        |                             |
| 194 | 1 | CD101703 | new      | normal | t      | SLAC2-B       | -        | 11q22.3  | Hs.138380 | UBE2V1    | -        | 20q13.13 | Hs.381025 | Placenta, NIH_MGC_147                                           |                             |
| 195 | 1 | BM921978 | new      | normal | t      | DKFZP564O1863 | -        | 12p11.23 | Hs.406184 | SMARCA2   | -        | 9p24.3   | Hs.396404 | Pooled brain, lung, and testis, NIH_MGC_115                     |                             |
| 196 | 1 | BI914945 | new      | normal | inv    | FLJ11088      | -        | 12p11.22 | Hs.406485 | PRH1      | -        | 12p13.2  | Hs.512634 | Brain, NIH_MGC_121                                              |                             |
| 197 | 1 | BU785369 | new      | normal | inv    | SENP1         | -        | 12q13.11 | Hs.389263 | LOC253827 | -        | 12q14.3  | Hs.339024 | Pancreas, islet                                                 |                             |
| 198 | 1 | BX444194 | new      | normal | t      | FLJ31295      | -        | 12q13.11 | Hs.23492  | TUBGCP6   | -        | 22q13.33 | Hs.336431 | Liver                                                           |                             |
| 199 | 1 | CD723306 | new      | normal | t      | KIAA1002      | -        | 12q13.3  | AB023219  | SMARCE1   | -        | 17q21.2  | Hs.437546 | Eye, lacrimal gland                                             |                             |
| 200 | 1 | BM805336 | new      | normal | t      | PITPNM2       | -        | 12q24.31 | Hs.272759 | MRPS5     | -        | 2q11.1   | Hs.387988 | Brain, hippocampus, NIH_MGC_124                                 |                             |
| 201 | 1 | BI827521 | new      | normal | t      | DNAJD1        | -        | 13q14.11 | Hs.438830 |           |          |          |           |                                                                 |                             |

|     |   |                       |          |         |        |                 |                 |          |           |                 |                 |          |           |                                               |                                            |
|-----|---|-----------------------|----------|---------|--------|-----------------|-----------------|----------|-----------|-----------------|-----------------|----------|-----------|-----------------------------------------------|--------------------------------------------|
| 202 | 1 | T28049                | new      | normal  | t      | <i>FNTB</i>     | -               | 14q23.3  | Hs.276    | <i>KIAA1078</i> | -               | 1q32.1   | Hs.23585  | Brain                                         |                                            |
| 203 | 1 | BM977906              | new      | normal  | inv    | <i>WARS</i>     | -               | 14q32.2  | Hs.82030  | <i>MARK3</i>    | -               | 14q32.32 | Hs.437625 | Lung                                          |                                            |
| 204 | 1 | BQ068183              | new      | normal  | t      | <i>ZFYFE21</i>  | -               | 14q32.33 | Hs.169575 | <i>BIN1</i>     | -               | 2q14.3   | Hs.193163 | Brain, NIH_MGC_121                            |                                            |
| 205 | 1 | CD172355              | new      | normal  | t      | <i>CSPG4</i>    | -               | 15q24.2  | Hs.436301 | <i>SON</i>      | -               | 21q22.11 | Hs.430541 | White matter, NIH_MGC_181                     |                                            |
| 206 | 1 | BF770432              | new      | normal  | t      | -               | -               | 16p13.3  | AL833594  | <i>AMD1</i>     | -               | 6q21     | Hs.159118 | Pooled lung and spleen, NIH_MGC_122           |                                            |
| 207 | 1 | BI832490              | new      | normal  | inv    | <i>N-PAC</i>    | -               | 16p13.3  | Hs.512788 | <i>MGC3248</i>  | -               | 16p12.2  | Hs.435941 | Pooled pancreas and spleen, NIH_MGC_120       |                                            |
| 208 | 1 | BM920046              | new      | normal  | t      | <i>SULT1A1</i>  | -               | 16p12.1  | Hs.142    | <i>NONO</i>     | -               | Xq13.1   | Hs.355861 | Pooled pancreas and spleen, NIH_MGC_120       |                                            |
| 209 | 1 | BG750040              | new      | normal  | t      | -               | -               | 16q22.2  | Hs.451353 | <i>PC326</i>    | -               | 1q24.2   | Hs.280168 | Eye, pigmented retinal epithelium, NIH_MGC_43 |                                            |
| 210 | 1 | BF725485              | new      | normal  | t      | <i>FLJ12270</i> | -               | 16q22.3  | Hs.413396 | <i>HMGB1</i>    | -               | 13q12.3  | Hs.434102 | Eye, iris                                     |                                            |
| 211 | 1 | BU688998              | new      | normal  | t      | <i>PSMB3</i>    | -               | 17q12    | Hs.82793  | <i>HINT1</i>    | -               | 5q23.3   | Hs.256697 | Lung                                          |                                            |
| 212 | 1 | BG427715              | new      | normal  | t      | <i>NBR2</i>     | -               | 17q21.31 | Hs.375149 | <i>NFYB</i>     | -               | 12q23.3  | Hs.84928  | Kidney, NIH_MGC_75                            |                                            |
| 213 | 1 | AV764395              | new      | normal  | t      | <i>NBR2</i>     | -               | 17q21.31 | Hs.375149 | <i>LOC51123</i> | -               | 8q22.3   | Hs.449945 | CD34+ hematopoietic stem/progenitor cell      |                                            |
| 214 | 1 | BM562060              | new      | normal  | t      | <i>ZNF147</i>   | -               | 17q23.2  | Hs.1579   | <i>KIAA1160</i> | -               | 3q21.3   | Hs.512661 | Leukocyte, NIH_MGC_118                        |                                            |
| 215 | 1 | BC017768              | BF696408 | new     | normal | t               | <i>FLJ12760</i> | -        | 17q23.3   | Hs.381204       | <i>C21orf66</i> | -        | 21q22.11  | Hs.297559                                     | Brain, primitive neuroectoderm, cell line, |
| 216 | 1 | CD683976              | new      | normal  | t      | <i>DDX5</i>     | -               | 17q24.1  | Hs.279806 | <i>PRKCB1</i>   | -               | 16p12.2  | Hs.349845 | Nasopharynx                                   |                                            |
| 217 | 1 | BI836301              | new      | normal  | t      | <i>PSCD1</i>    | -               | 17q25.3  | Hs.1050   | <i>TERF2</i>    | -               | 16q22.1  | Hs.63335  | Pooled pancreas and spleen, NIH_MGC_120       |                                            |
| 218 | 1 | BX433170,<br>BX451285 | new      | normal  | t      | <i>FN3K</i>     | -               | 17q25.3  | Hs.151135 | <i>TARBP1</i>   | -               | 1q42.2   | Hs.151518 | Brain                                         |                                            |
| 219 | 1 | BX418659              | new      | normal  | t      | <i>RALBP1</i>   | -               | 18p11.22 | Hs.75447  | <i>LOC92906</i> | -               | 2p22.1   | Hs.404336 | Brain                                         |                                            |
| 220 | 1 | BQ717786              | new      | normal  | inv    | <i>DAZAP1</i>   | -               | 19p13.3  | Hs.439505 | <i>FKBP8</i>    | -               | 19p13.11 | Hs.173464 | Dorsal root ganglia                           |                                            |
| 221 | 1 | AK098316              | new      | normal  | t      | <i>OAZ1</i>     | -               | 19p13.3  | Hs.446427 | <i>ULK2</i>     | -               | 17p11.2  | Hs.168762 | Uterus                                        |                                            |
| 222 | 1 | CB153060              | new      | normal  | inv    | <i>OAZ1</i>     | -               | 19p13.3  | Hs.446427 | <i>FKBP8</i>    | -               | 19p13.11 | Hs.173464 | Brain                                         |                                            |
| 223 | 1 | AA706989              | new      | normal  | t      | <i>EEF2</i>     | -               | 19p13.3  | Hs.75309  | <i>AUP1</i>     | -               | 2p13.1   | Hs.411480 | Fetal liver and spleen                        |                                            |
| 224 | 1 | BU664229              | new      | normal  | t      | <i>GIOT-1</i>   | -               | 19q13.12 | Hs.157203 | <i>MGC24976</i> | -               | 15q26.3  | Hs.429492 | Blood, erythroid precursor cell               |                                            |
| 225 | 1 | BM922123              | new      | normal  | t      | -               | -               | 19q13.2  | Hs.379750 | <i>KIAA0937</i> | -               | 11q12.1  | Hs.62264  | Pooled brain, lung, and testis, NIH_MGC_115   |                                            |
| 226 | 1 | BQ897931              | new      | normal  | t      | <i>LU</i>       | -               | 19q13.32 | Hs.155048 | <i>AHS42</i>    | -               | 2p15     | Hs.122440 | Brain, dorsal root ganglia                    |                                            |
| 227 | 1 | CD512958              | new      | normal  | t      | <i>FLJ12586</i> | -               | 19q13.43 | Hs.458377 | <i>SNRPN</i>    | -               | 15q11.2  | Hs.48375  | Brain, pituitary, NIH_MGC_179                 |                                            |
| 228 | 1 | CD512862              | new      | normal  | t      | -               | -               | 20q13.32 | Hs.473192 | <i>TSC22</i>    | -               | 13q14.11 | Hs.114360 | Brain, pituitary, NIH_MGC_179                 |                                            |
| 229 | 1 | CB152085              | new      | normal  | t      | -               | -               | 21q21.1  | Hs.102754 | <i>SBB126</i>   | -               | 7p15.3   | Hs.376793 | Brain                                         |                                            |
| 230 | 1 | CD691174              | new      | normal  | t      | <i>FLJ22349</i> | -               | 22q13.2  | Hs.171012 | <i>ZNF754</i>   | -               | 16p13.3  | Hs.50456  | Nasopharynx                                   |                                            |
| 231 | 1 | AL536431,<br>BX444897 | new      | normal  | t      | <i>SHANK3</i>   | -               | 22q13.33 | Hs.442356 | <i>SNX26</i>    | -               | 19q13.12 | Hs.21036  | Brain                                         |                                            |
| 232 | 1 | BM174904              | new      | normal  | t      | <i>SHANK3</i>   | -               | 22q13.33 | Hs.442356 | <i>FLJ31164</i> | -               | 8q24.3   | Hs.311783 | Hippocampus                                   |                                            |
| 233 | 1 | S69272                | new      | unknown | t      | -               | -               | 5p13.1   | Hs.364642 | <i>SERPINB6</i> | -               | 6p25.2   | Hs.41072  | Unknown                                       |                                            |
| 234 | 1 | AF314817              | new      | unknown | inv    | <i>FGFR1OP</i>  | MF              | 6q27     | Hs.180296 | <i>TAGAP</i>    | -               | 6q25.3   | Hs.123581 | Unknown                                       |                                            |
| 235 | 1 | AW954969              | new      | unknown | inv    | <i>POM121</i>   | -               | 7q11.23  | Hs.380964 | <i>POMZP3</i>   | -               | 7q11.23  | Hs.296380 | MAGE resequences, MAGC                        |                                            |
| 236 | 1 | BX491432              | new      | unknown | t      | <i>SFI</i>      | -               | 11q13.1  | Hs.440835 | <i>ZFP28</i>    | -               | 19q13.43 | Hs.14794  | Pooled                                        |                                            |
| 237 | 1 | BX490578              | new      | unknown | t      | -               | -               | 11q22.3  | Hs.476920 | <i>HINT1</i>    | -               | 5q23.3   | Hs.256697 | Pooled                                        |                                            |

\*aberration; t, translocation; inv, inversion; r, reciprocal fusion transcript is detected.

<sup>†</sup>M, reported in the list by Mitelman *et al.* (1); F, reported in the list by Futreal *et al.* (2); -, not in either list.

<sup>‡</sup>chromosomal band.

1. Mitelman, F., Johansson, B. & Mertens, F. (2004) *Nat. Genet.* **36**, 331–334.

2. Futreal, P. A., Coin, L., Marshall, M., Down, T., Hubbard, T., Wooster, R., Rahman, N. & Stratton, M. R. (2004) *Nat. Rev. Cancer* **4**, 177–183.
